# Supplementary material for: Revealing the developmental origin and lineage predilection of neural progenitors within human bone marrow via single-cell analysis: implications for regenerative medicine
Source: PubMed Central journal article supplement (PMC10476295; doi:10.1186/s13073-023-01224-0), 2023-09-04
Supplement: 13073_2023_1224_MOESM1_ESM.pdf [file 13073_2023_1224_MOESM1_ESM.pdf]

**Table S1: Primary antibodies for immunofluorescence**

| Antibody                 | Concentration | Manufacturer              |
|--------------------------|---------------|---------------------------|
| Nestin (Mouse IgG)       | 1:200         | BD Pharmingen             |
| NGFR (Rabbit IgG)        | 1:1000        | Abcam                     |
| Snail2 (Rabbit IgG)      | 1:200         | Cell Signaling Technology |
| S100 $\beta$ (Mouse IgG) | 1:100         | Abcam                     |
| Tuj1 (Rabbit IgG)        | 1:500         | BioLegend                 |

**Table S2: Primers for real-time quantitative (q) PCR**

| Markers      | Forward primer          | Reverse primer         |
|--------------|-------------------------|------------------------|
| NGFR         | GGCACCGCCTTCTCTAAATG    | GCAAGCATCCCATCTCCAC    |
| BMP4         | AAGAGCAGATCCACAGCACT    | AAGCAGAGTTTTCACTGGTCC  |
| Sox9         | TGCAGGAGGAGAAGAGAAGG    | GTGGCCAGTTCACAGCTGC    |
| Snail2       | CTGGTCAAGAAGCATTTC AACG | AGGATCTCTGGTTGTGGTATGA |
| Dlx2         | ATGGGTTTCCTACCAGTACCAA  | TCCTTCTCAGGCTCGTTGTT   |
| Sox2         | GAGCTTTGCAGGAAGTTTGC    | GCAAGAAGCCTCTCCTTGAA   |
| Nestin       | AACAGCGACGGAGGTCTCTA    | TTCTCTTGTCCC GCAGACTT  |
| Pax6         | AGGGCCAAATGGAGAAGAGAA   | GGTAGACACTGGTGCTGAAAC  |
| Tuj1         | GCGCATCAGCGTATACTACAA   | TTCCAAGTCCACCAGAATGG   |
| S100 $\beta$ | TCATCAACAATGAGCTTTCCCA  | ATTCGCCGTCTCCATCATTGT  |
| GAPDH        | GACGCTGGGGCTGGCATTG     | GCTGGTGGTCCAGGGGTC     |

**Table S3: Details of the scRNA-seq datasets**

| Name                       | Sample size (n) | Age (sex)                                  | Origin                             | GEO number |
|----------------------------|-----------------|--------------------------------------------|------------------------------------|------------|
| Human embryonic long bones | 3               | 8 weeks post conception                    | Embryonic long bones               | GSE143753  |
| Fresh BMSC                 | 2               | 84-year-old (male)<br>67-year-old (female) | Femoral head bone marrow aspirates | GSE147287  |
| Cultured BMSC              | 1               | 41-year-old (female)                       | Long bone aspirates                | /          |
| BMSC-neurosphere           | 1               | 41-year-old (female)                       | Long bone aspirates                | /          |

**Table S4: Genes contributing to the GO Enrichment Analysis items**

| Cluster | Biological process items     | Intersections                                                                                                                                                                                                                                                                                                                                                                                                                                                                                              |
|---------|------------------------------|------------------------------------------------------------------------------------------------------------------------------------------------------------------------------------------------------------------------------------------------------------------------------------------------------------------------------------------------------------------------------------------------------------------------------------------------------------------------------------------------------------|
| C11     | muscle structure development | TNNI1,MYOG,PROX1,ACTN2,RYR2,ZBTB18,NEB,TANC1,XIRP2,KLHL41,CHRNA1,TTN,MSTN,DES,PAX3,CHRND,CAV3,TNNC1,LMOD3,MYOZ2,PDLIM3,MEGF10,RBM24,MYMX,COL19A1,VGLL2,DLL1,LMOD2,MSC,JPH1,HEY1,ADGRB1,TMOD1,CAVIN4,MYOZ1,SYNPO2L,LDB3,ANKRD1,SMTNL1,HSPB2,ITGA7,ERBB3,STAC3,MYF6,FGF9,AKAP6,ASB2,ACTC1,ALPK3,TRIM72,CHRN1,MYH3,TCAP,SGCA,RNF165,NMRK2,RYR1,SIRT2,DMPK,MAMSTR,TNNT1,TNNI3,JPH2,RBM38,MYO18B,FOXO4,ITGB1BP2,SRPK3,PAX7,RXRG,ACTA1,SMYD1,LBX1,BARX2,MYF5,PDGFB,POU4F1,UNC45B,CACNA1S,TNNT2,KLHL40,MYMK,MYOD1 |
|         | muscle cell differentiation  | MYOG,PROX1,ACTN2,NEB,TANC1,KLHL41,TTN,CAV3,LMOD3,MYOZ2,MEGF10,RBM24,MYMX,DLL1,LMOD2,HEY1,ADGRB1,TMOD1,MYOZ1,SYNPO2L,LDB3,ANKRD1,STAC3,MYF6,FGF9,AKAP6,ASB2,ACTC1,ALPK3,TRIM72,CHRN1,MYH3,TCAP,RYR1,DMPK,MAMSTR,TNNT1,RBM38,MYO18B,FOXO4,ACTA1,SMYD1,BARX2,MYF5,PDGFB,CACNA1S,TNNT2,KLHL40,MYMK,MYOD1                                                                                                                                                                                                       |
| FC1     | neurogenesis                 | MDK,THY1,VCAN,FZD1,CLU,NLGN4X,FLNA,APOE,CDH11,EFNB1,NGFR,UBB,FN1,PLXNB2,ANXA2,GRN,MARCKS,COL3A1,PRMT1,UNC5B,MMP2,IL34,VIM,SLIT3,TNC,DDIT4,CALR,ADM,GAS6,HSPA5,GPM6B,ID4,ID3,PLEC,EDNRA,ENAH,HEP1,MME,NDRG1,ARF4,NOTCH3,HSP90AA1,JUN,CNTNAP2,ARHGFE10,NAV3,VCL,RTN4RL1,SERPINF1,SOX4,RPL24,LRP1,HGF,UGCG,MXRA8,LAMB1,DCLK1,SLC1A3,PALLD,GLDN                                                                                                                                                                |
|         | nervous system development   | MDK,THY1,VCAN,FZD1,CLU,NLGN4X,FLNA,APOE,CDH11,EFNB1,NGFR,UBB,FN1,PLXNB2,ANXA2,DLC1,GRN,MARCKS,COL3A1,PRMT1,UNC5B,COL4A1,MMP2,IL34,VIM,SLIT3,TNC,DDIT4,APOB,CALR,ADM,GAS6,GRIK1,HSPA5,DYNLL1,CALM3,GPM6B,ID4,ID3,PLEC,EDNRA,ENAH,HES1,MME,NDRG1,PLCB1,HSPG2,CTSC,ARF4,NOTCH3,CYP1B1,HSP90AA1,JUN,CNTNAP2,FOXC1,ARHGFE10,NAV3,MTHFD1L,VCL,RTN4RL1,SERPINF1,SOX4,RPL24,LRP1,HGF,UGCG,MXRA8,LAMB1,ZEB2,DCLK1,SLC1A3,PALLD,GLDN                                                                                 |
| NC3     | neurogenesis                 | HHIP,CLU,PTPRD,PTN,FOXO1,GPM6B,GDF6,ITM2C,CTNNA1,TENM4,ID1,CDKN1C,LRP1,BMP4,PTK2,ID3,TCF4,PPP3CA,NRN1,GBA2,GAS7,EPHB2,PLXNA2,MDK,ALCAM,FEZ1,S100A10,TMEM98,PBX1,SOX4,PTPRG,RAB11A,NTN1,ZNF521,ZEB1,STMN1,APOD,MEF2C,MAN2A1,FAT3                                                                                                                                                                                                                                                                            |
|         | nervous system development   | HAPLN1,HHIP,CLU,PTPRD,PTN,FOXO1,GPM6B,GDF6,ITM2C,CTNNA1,TENM4,ID1,MAFB,CDKN1C,MARCKSL1,LRP1,BMP4,PTK2,PITX1,ID3,TCF4,PPP3CA,NRN1,GBA2,GAS7,EPHB2,PLXNA2,MDK,ALCAM,FEZ1,S100A10,TMEM98,PBX1,SOX4,NFIA,STK3,PTPRG,RAB11A,NTN1,ZNF521,ECRG4,ZEB1,NINJ1,STMN1,APOD,MEF2C,SSBP3,MAN2A1,FAT3                                                                                                                                                                                                                     |
| NC5     | nervous system development   | SERPINF1,TENM4,CADM1,SLIT2,CTHRC1,PPP3CA,CTSC,THBS2,GSN,MARCKSL1,PALLD,TWIST1,S100A10,CHRM3,MARCKS,PAM,ETV1,PTPRD,PTPN13,SATB2,NAV3,SYNJ2,ITGA1,HGF,CMTM8,HDAC9,NREP,MAFB,SOX4,CXCL12,SLC1A3,CTNNA1,CEBPB,NR2F2,BHLHE41,IRX3,TGFBR2,IGF2BP2,FEZ1,B4GALT5,DOCK10,SERINC5,JUN,SPOCK1,ZFP36L1,NEO1,RYK,VEGFA,PRRX1,ETV6,TBX2,BEND6,NTM,GPC4,TGM2,SRGAP2B,BASP1,TUBB3,MEIS2,WNT5B,TGFB2,TANC2,ZNF521,SPP1                                                                                                      |

**Table S5: Markers for assignment of cellular identity in embryonic long bone**

| <b>Cell type</b> | <b>Markers</b>                                                                   |
|------------------|----------------------------------------------------------------------------------|
| mBMSC            | PDGFRA <sup>high+</sup> /Cxcl12 <sup>high+</sup>                                 |
| eMSC             | PDGFRA+ / Cxcl12+ / Pitx1+ / Foxp1+ / GAS1+ / Twist1+ / Twist2+                  |
| Osteoprogenitor  | OGN+ / Prrx1+/Runx2+/Dlx5+                                                       |
| pBMSC            | PDGFRA+ / Cxcl12+ / MKI67+ / CDK1+                                               |
| Chondroblast     | Sox9+ / COL2A1+                                                                  |
| Chondrocyte      | Sox9+ / COL2A1 <sup>high+</sup> / SNORC <sup>high+</sup> / ACAN <sup>high+</sup> |
| SSC              | SFRP2+ / OSR2+ / CDON+ / Pitx1+/ Foxp1+ / GAS1+                                  |
| Pericyte         | MCAM+ / PDGFRB+                                                                  |
| NCSC             | MYC+ / NES+ / PAX7+ / SOX8+ / NGFR+ / Snail2+                                    |
| SCP              | NGFR+ / S100B+ / ERBB3+ / Sox10+ / Plp1+ / P0+                                   |
